# Supplementary material for: OLIGOTREND, towards a global database of multi-decadal chlorophyll-a and water quality timeseries for rivers, lakes and estuaries
Source: Copernicus journal article supplement (doi:10.5194/essd-2025-58), 2025-02-24
Supplement: Supplementary file 1 [file essd-2025-58-supplement.pdf]

# Supplement to “OLIGOTREND, a global database of multi-decadal chlorophyll-a and water quality timeseries for rivers, lakes and estuaries”

5 Camille Minaudo<sup>1,2</sup>, Andras Abonyi<sup>3,4,5</sup>, Carles Alcaraz<sup>6</sup>, Jacob Diamond<sup>7</sup>, Nicholas J.K. Howden<sup>8,9</sup>,  
Michael Rode<sup>10,11</sup>, Estela Romero<sup>12,1</sup>, Vincent Thieu<sup>13</sup>, Fred Worrall<sup>14</sup>, Qian Zhang<sup>15</sup>, Xavier Benito<sup>6,1</sup>

<sup>1</sup>Departament de Biologia Evolutiva, Ecologia i Ciències Ambientals, Universitat de Barcelona (UB), Diagonal 643, 08028 Barcelona, Spain

<sup>2</sup>Institut de Recerca de la Biodiversitat (IRBio), Universitat de Barcelona (UB), Diagonal 643, 08028 Barcelona, Spain

<sup>3</sup>MTA-ÖK Lendület Fluvial Ecology Research Group, Karolina Street 29, H-1113 Budapest, Hungary

10 <sup>4</sup>HUN-REN Centre for Ecological Research, Institute of Aquatic Ecology, Karolina Street 29, H-1113 Budapest, Hungary

<sup>5</sup>WasserCluster Lunz – Biologische Station GmbH, Dr. Carl Kupelwieser Promenade 5, A-3293 Lunz am See, Austria

<sup>6</sup>Marine and Continental Waters Program, Institute of Agrifood Research and Technology (IRTA), 43540 La Ràpita, Catalonia, Spain

<sup>7</sup>Intergovernmental Hydrological Programme, UNESCO, Paris, France, 7 Place de Fontenoy 75015

15 <sup>8</sup>School of Civil, Aerospace and Design Engineering, University of Bristol, Bristol, BS8 1TR, UK

<sup>9</sup>Cabot Institute, University of Bristol, Bristol, BS5 9LT, UK

<sup>10</sup>Department of Aquatic Ecosystem Analysis and Management, Helmholtz Centre for Environmental Research - UFZ, Magdeburg 39104, Germany

<sup>11</sup>Institute of Environmental Science and Geography, University of Potsdam, Potsdam 14476, Germany

20 <sup>12</sup>Global Ecology Unit, Centre for Ecological Research and Forestry Applications (CREAF), Campus UAB, Bellaterra, Spain

<sup>13</sup>Sorbonne Université, CNRS, EPHE, UMR 7619 METIS, 4 place Jussieu, Box 105, 75005, Paris, France

<sup>14</sup>Department of Earth Sciences, University of Durham, Durham, UK

<sup>15</sup>University of Maryland Center for Environmental Science. U.S. Environmental Protection Agency Chesapeake Bay Program, 1750 Forest Drive, Suite 130, Annapolis, MD 21401, United States

25

*Correspondence to:* Camille Minaudo ([camille.minaudo@ub.edu](mailto:camille.minaudo@ub.edu))

**Table S1 - OLIGOTREND timeseries characteristics by basin**

| basin                               | n_total | n_estuary | n_lake | n_river | length_ysr | n_obs            | n_years    |
|-------------------------------------|---------|-----------|--------|---------|------------|------------------|------------|
| seine                               | 320     | 21        | 0      | 299     | 36 (16-43) | 189 (72-316)     | 27 (16-42) |
| unitedstatesnorthatlanticcoast      | 266     | 153       | 71     | 42      | 33 (19-35) | 399 (148-585)    | 34 (17-36) |
| mississippimissouri                 | 231     | 0         | 231    | 0       | 31 (21-37) | 110 (48-269)     | 20 (15-28) |
| francewestcoast                     | 183     | 0         | 0      | 183     | 34 (18-42) | 200 (78-384)     | 29 (17-41) |
| englandandwales                     | 163     | 0         | 33     | 130     | 34 (19-45) | 292 (175-619)    | 27 (19-40) |
| loire                               | 138     | 2         | 1      | 135     | 30 (21-43) | 248 (78-482)     | 29 (19-43) |
| atlanticoceanseaboard               | 111     | 0         | 111    | 0       | 21 (17-33) | 77 (34-251)      | 19 (15-25) |
| stlawrence                          | 92      | 0         | 92     | 0       | 27 (19-35) | 128 (46-352)     | 20 (15-26) |
| gironde                             | 74      | 1         | 0      | 73      | 40 (20-41) | 207 (63-514)     | 35 (17-42) |
| denmarkgermanycoast                 | 56      | 0         | 56     | 0       | 33 (21-42) | 165 (33-481)     | 19 (15-31) |
| california                          | 46      | 46        | 0      | 0       | 42 (18-46) | 297 (109-592)    | 27 (18-47) |
| rhone                               | 45      | 0         | 1      | 44      | 32 (26-33) | 217 (42-364)     | 28 (16-34) |
| sweden                              | 33      | 0         | 33     | 0       | 26 (20-53) | 238 (108-345)    | 21 (16-41) |
| elbe                                | 25      | 2         | 0      | 23      | 31 (22-38) | 581 (145-8490)   | 30 (22-39) |
| newzealand                          | 21      | 0         | 21     | 0       | 17 (16-17) | 161 (33-373)     | 18 (14-18) |
| saskatchewannelson                  | 19      | 0         | 19     | 0       | 29 (17-48) | 90 (31-454)      | 16 (13-35) |
| francesouthcoast                    | 13      | 0         | 0      | 13      | 33 (29-33) | 294 (73-401)     | 29 (21-34) |
| columbiaandnorthwesternunitedstates | 10      | 0         | 0      | 10      | 30 (21-31) | 682 (512-1093)   | 26 (21-31) |
| japan                               | 8       | 0         | 5      | 3       | 30 (15-39) | 346 (139-504)    | 29 (15-40) |
| gulfofmexiconorthatlanticcoast      | 7       | 7         | 0      | 0       | 21 (16-30) | 214 (189-343)    | 22 (17-31) |
| floridacoastaleverglades            | 6       | 6         | 0      | 0       | 20 (16-33) | 211 (189-368)    | 21 (17-34) |
| rhine                               | 5       | 0         | 3      | 2       | 16 (16-35) | 406 (280-685)    | 17 (16-21) |
| scotland                            | 4       | 0         | 1      | 3       | 38 (22-48) | 361 (215-712)    | 33 (21-35) |
| mackenzie                           | 3       | 0         | 3      | 0       | 34 (34-35) | 133 (112-144)    | 20 (20-22) |
| mediterraneanseaislands             | 3       | 0         | 0      | 3       | 34 (23-35) | 140 (34-303)     | 29 (17-35) |
| scandinaviannorthcoast              | 3       | 0         | 3      | 0       | 35 (29-41) | 441 (389-626)    | 35 (29-42) |
| danube                              | 2       | 0         | 0      | 2       | 33 (33-33) | 1100 (1010-1127) | 33 (29-34) |
| murraydarling                       | 2       | 0         | 0      | 2       | 34 (26-34) | 782 (329-1685)   | 35 (25-35) |
| ebro                                | 1       | 0         | 0      | 1       | 24 (15-24) | 284 (133-323)    | 24 (16-25) |
| limpopo                             | 1       | 0         | 1      | 0       | 20 (20-20) | 2735 (2735-2735) | 18 (18-18) |
| maas                                | 1       | 0         | 0      | 1       | 16 (16-16) | 700 (506-723)    | 17 (16-17) |
| northwestterritories                | 1       | 0         | 1      | 0       | 37 (36-37) | 99 (84-146)      | 22 (21-22) |
| orange                              | 1       | 0         | 1      | 0       | 19 (19-19) | 180 (180-180)    | 17 (17-17) |

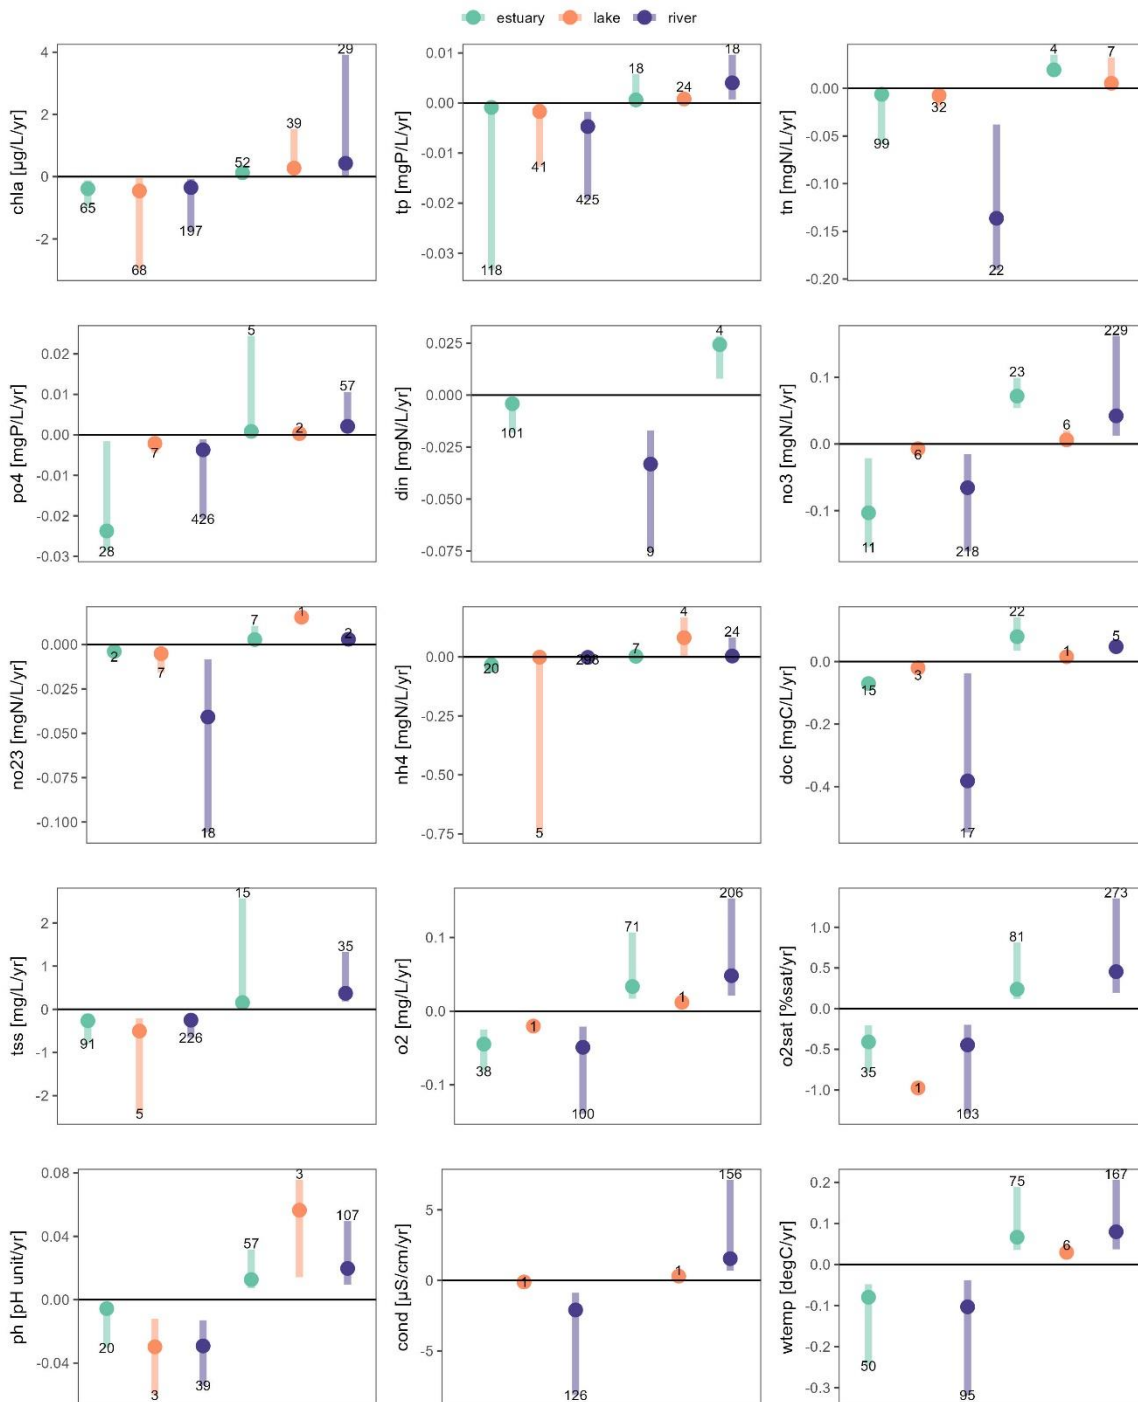

**Figure S1.** Overview of all Sen's slopes calculated for all timeseries in the OLIGOTREND database, whether they are showing a declining (negative values) or a rising trend (positive values). Medians by ecosystem type are indicated with a plain circle, 10th and

35 **90th percentiles correspond to the segment ends. The numbers of timeseries found for each variable, ecosystem and trend type are indicated at the bottom or the top of each segment.**
